# Supplementary material for: Exploring bee functional trait response to the agro-environment: a possible contribution to the future design of a farm-level indicator
Source: Springer Nature journal article supplement (doi:10.1007/s10661-025-14394-8), 2025-08-10
Supplement: MOESM1 [file 10661_2025_14394_MOESM1_ESM.doc]

Supplementary Material to

“Exploring bee functional trait response to the agro-environment: a possible contribution to the future design of a farm-level indicator”

Manuela Giovanetti, Emanuele Luigi Zenga, Marco d’Agostino, Simone Flaminio, Marta Galloni, Laura Bortolotti, Marino Quaranta


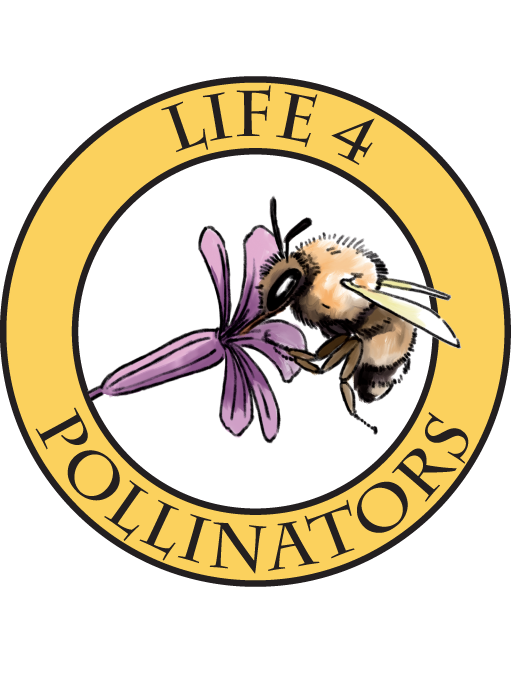
**Questionnaire to farmers involved in the Life4Pollinators project**

This questionnaire was first devoted for the collection of data related to farming activities and measures, as predicted in the Action B.4 of the Life4Pollinators project. The data were used to frame the agronomic characteristics of farms within the Pilot Project.

The first part of the questionnaire aims to provide a general overview of the agricultural regime adopted in the farm. As farm, we considered all the acres belonging/managed for growing crops as a business. The parameters we included in the questionnaire were already considered valid indicators of farm management by the BioBio project.

The second part aims to characterize the area surrounding the transects. Farms can work acres in distant monitored agricultural unit(s) and depending on local crops, practice may vary. We asked for more detailed information and for each of the main crops, we separately asked information on all factors potentially impacting pollinators.

# PART 1 - Farm

| **1. Farm Name** *(information not to be disclosed)* | |
| --- | --- |
|  | |
| **2. Type of Management** (organic, integrated pest management, conventional) | |
|  | |
| **3. What is the total area of the farm?** (ha) | |
|  | |
| **4. How many different crops are present on the farm?** | |
| Total in the farm: | |
| **5. What is the utilized agricultural area (UAA)?** (ha) | |
| Total in the farm: | |
| **6.**  **How much fuel was used in the past year?** (liters) | |
| Total in the farm: | |
| **7.**  **What were the total expenses incurred in the past year ?**  **(e.g., fuel, fertilizers, pesticides, labor…)** (euros) | |
| Total in the farm: | |
| **8.**  **How many kg of nitrogen were used for fertilization in the past year ?** | |
| Total in the farm: | |
| **9.**  **How many kg of pesticides (herbicides, fungicides, insecticides) were used in the past year ?**  **How many of these were insecticides?** | |
| Total in the farm: | Insecticides |
| **10. How many weed control interventions were conducted on uncultivated land in the past year ?** | |
| Mechanical weeding: | Chemical weeding: |

# PART 2 - MONITORED AREA (around the 4 transects)

| **1. What is the size of the agricultural unit(s) where the transects are placed?** (ha) | | | | | | | |
| --- | --- | --- | --- | --- | --- | --- | --- |
|  | | | | | | | |
| **2. How many different crops are present in the monitored agricultural unit(s)?** | | | | | | | |
|  | | | | | | | |
| **3. What is the Utilized Agricultural Area (UAA) of the monitored agricultural unit(s)?** | | | | | | | |
|  | | | | | | | |
| **4. What are the top 5 crops by land extension in the monitored agricultural unit(s)?** | | | | | | | |
| Crop | Permanent crop or arable land | Irrigation  (Yes/No) | Soil Tillage  (Yes/No) | Fertilizer use  (kg/ha) | Herbicide use  (number of applications) | Fungicide use  (number of applications) | Insecticide use  (number of applications) |
| 1. |  |  |  |  |  |  |  |
| 2. |  |  |  |  |  |  |  |
| 3. |  |  |  |  |  |  |  |
| 4. |  |  |  |  |  |  |  |
| 5. |  |  |  |  |  |  |  |
